# Supplementary material for: HDAC stimulates gene expression through BRD4 availability in response to IFN and in interferonopathies
Source: PubMed Central journal article supplement — J Exp Med. 2018 Dec 3;215(12):3194–212. doi: 10.1084/jem.20180520 (PMC6279398; doi:10.1084/jem.20180520), 2018-12-03
Supplement: JEM_20180520_sm.pdf [file JEM_20180520_sm.pdf]

## Supplemental material

Marié et al., <https://doi.org/10.1084/jem.20180520>

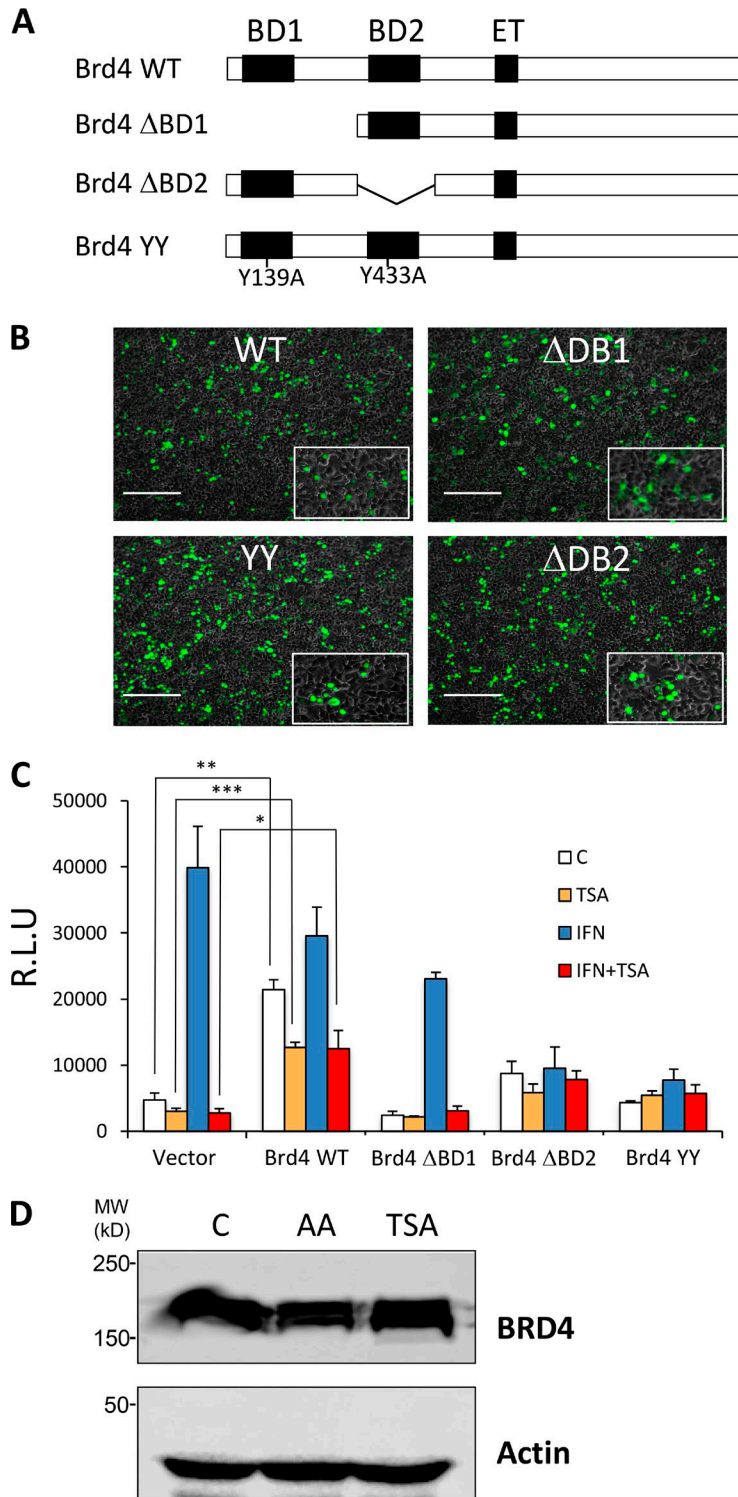

Figure S1. **Acetyl-lysine-binding bromodomains of BRD4 are required for ISG regulation.** (A) Diagram of Brd4 WT and mutant constructs. BD, bromo-domain; ET, extraterminal domain. (B and C) HEK293T cells were transfected with empty vector (Vector), Brd4 wild type (Brd4 WT), or mutants (as shown in A) as GFP fusion expression constructs, along with a luciferase reporter driven by the ISG54 promoter. 24 h after transfection, cells were imaged to monitor expression (B) and were either left untreated or treated with IFN- $\alpha$  for 12 h in the absence or presence of TSA before being assayed for luciferase activity (C). Bars, 500  $\mu$ m; boxed insert, additional 2 $\times$  magnification. Luciferase data are shown as the mean and standard deviation of triplicate biological samples and represent an example of two experiments. \*,  $P < 0.01$ ; \*\*,  $P < 0.001$ ; \*\*\*,  $P < 0.0001$ . R.L.U., relative light units. (D) Abundance of total nuclear BRD4 was assessed by immunoblot in nuclear extracts of cells untreated or treated for 2 h with anacardic acid (AA) or TSA.

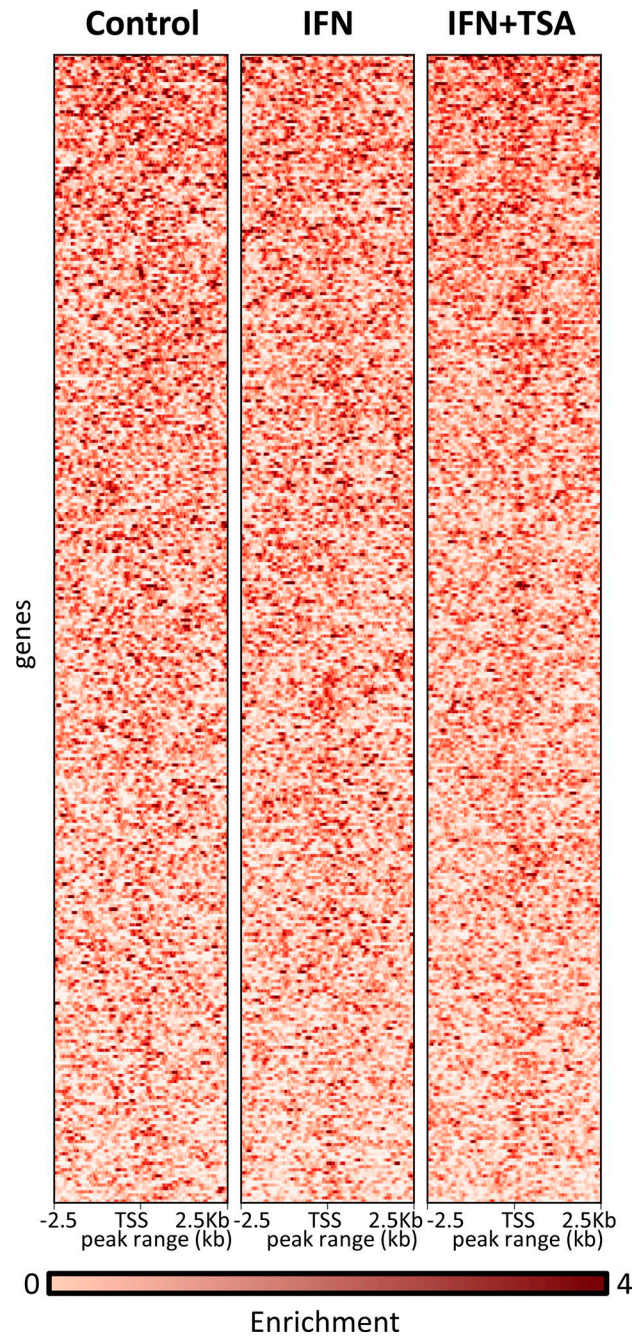

Figure S2. **BRD4 recruitment to control genes is not affected by IFN treatment.** Heat map of BRD4 binding at gene segments  $\pm 2.5$  kb relative to TSS for genes showing no consistent modulation of BRD4 binding following IFN treatment. Each row represents a unique gene segment.

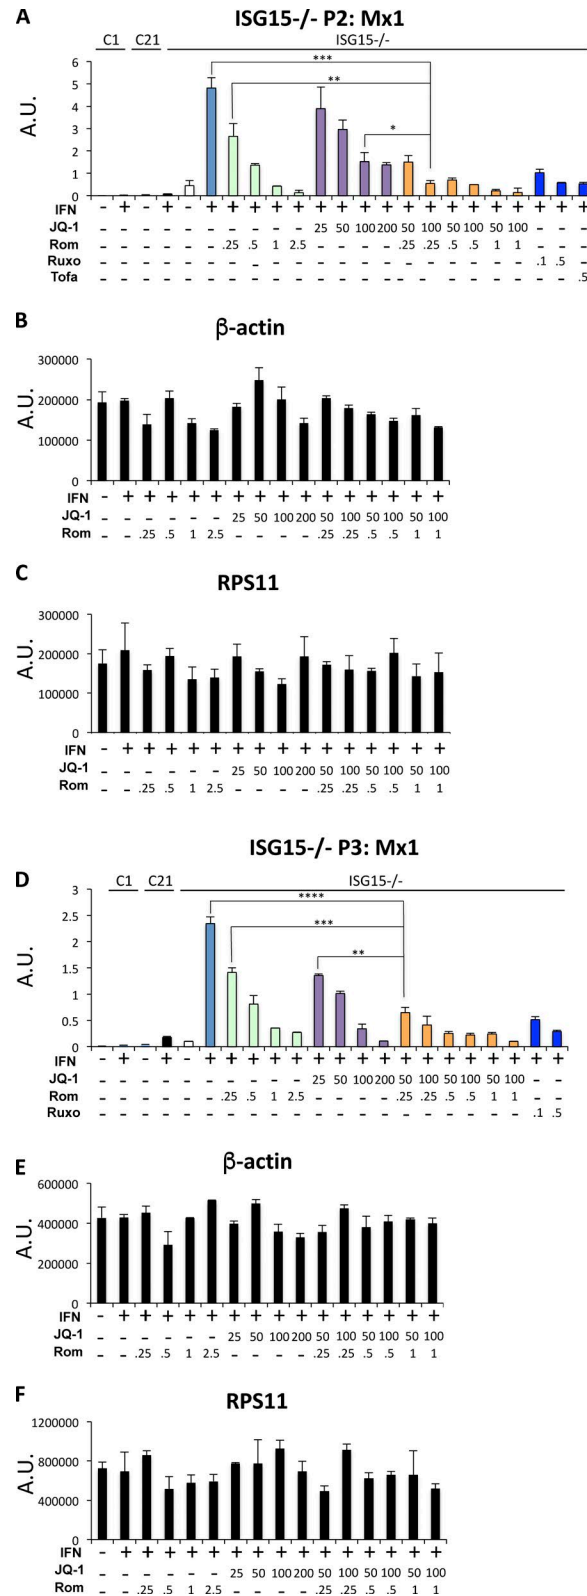

Figure S3. **Analysis of cells from additional normal and ISG15 mutant patients. (A and D)** hTert-immortalized human fibroblasts from two independent ISG15-deficient patients (P1 and P3) and two independent healthy donors (C1 and C21) were treated with IFN- $\alpha$  for 8 h, washed with PBS, and incubated in the absence of IFN for 3 d. Where indicated, cells were treated with JQ-1, romidepsin, or a combination of the two drugs (nM) for the final 24 h before RNA extraction. Ruxolitinib and tofacitinib treatments ( $\mu$ M) were included for comparison. Mx1 mRNA was quantified using real-time RT-PCR and normalized to GAPDH mRNA abundance. **(B and E)**  $\beta$ -Actin mRNA was quantified by real-time RT-PCR. **(C and F)** RPS11 pre-mRNA abundance was quantified by real-time RT-PCR using primers spanning an exon-intron junction. \*,  $P < 0.08$ ; \*\*,  $P < 0.04$ ; \*\*\*,  $P < 0.02$ ; \*\*\*\*,  $P < 0.005$  for representative experiments (of two) performed in duplicate, and error bars represent +SD. A.U., arbitrary units.

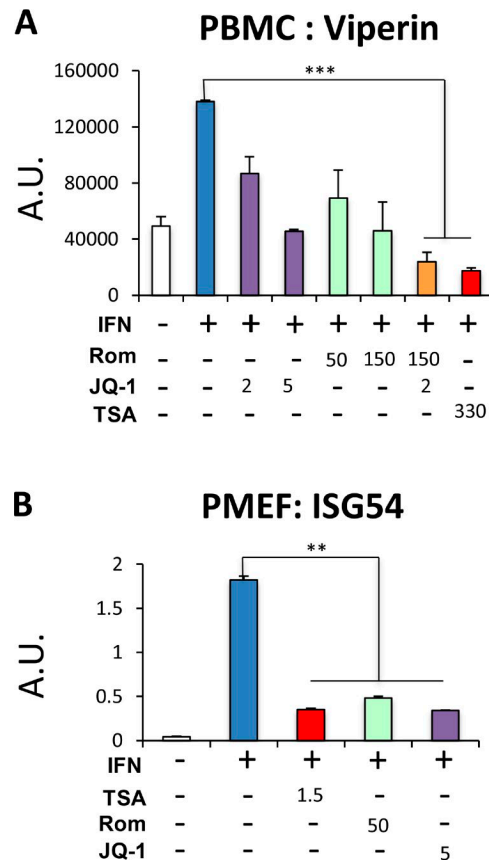

Figure S4. **ISG expression in primary cells analyzed ex vivo is sensitive to HDAC and BRD4 inhibitors.** **(A)** PBMCs from a healthy donor were treated with 250 U/ml IFN- $\alpha$  for 5 h as indicated along with romidepsin (Rom, nM), JQ-1 ( $\mu$ M), TSA (nM), or a combination of Romidepsin and JQ-1 as indicated, before RNA extraction. Viperin mRNA was quantified using real-time RT-PCR and normalized to GAPDH mRNA abundance. **(B)** Primary mouse embryonic fibroblasts (PMEFs) were treated with 500 U mouse IFN- $\alpha$  for 6 h in combination with TSA (1.5  $\mu$ M), romidepsin (50 nM), or JQ-1 (5  $\mu$ M) as indicated, before RNA extraction. ISG54 mRNA was quantified using real-time RT-PCR and normalized to GAPDH mRNA abundance. \*\*,  $P < 0.004$ ; \*\*\*,  $P < 0.005$  for representative experiments (of two) performed in duplicate, and error bars represent +SD. A.U., arbitrary units.

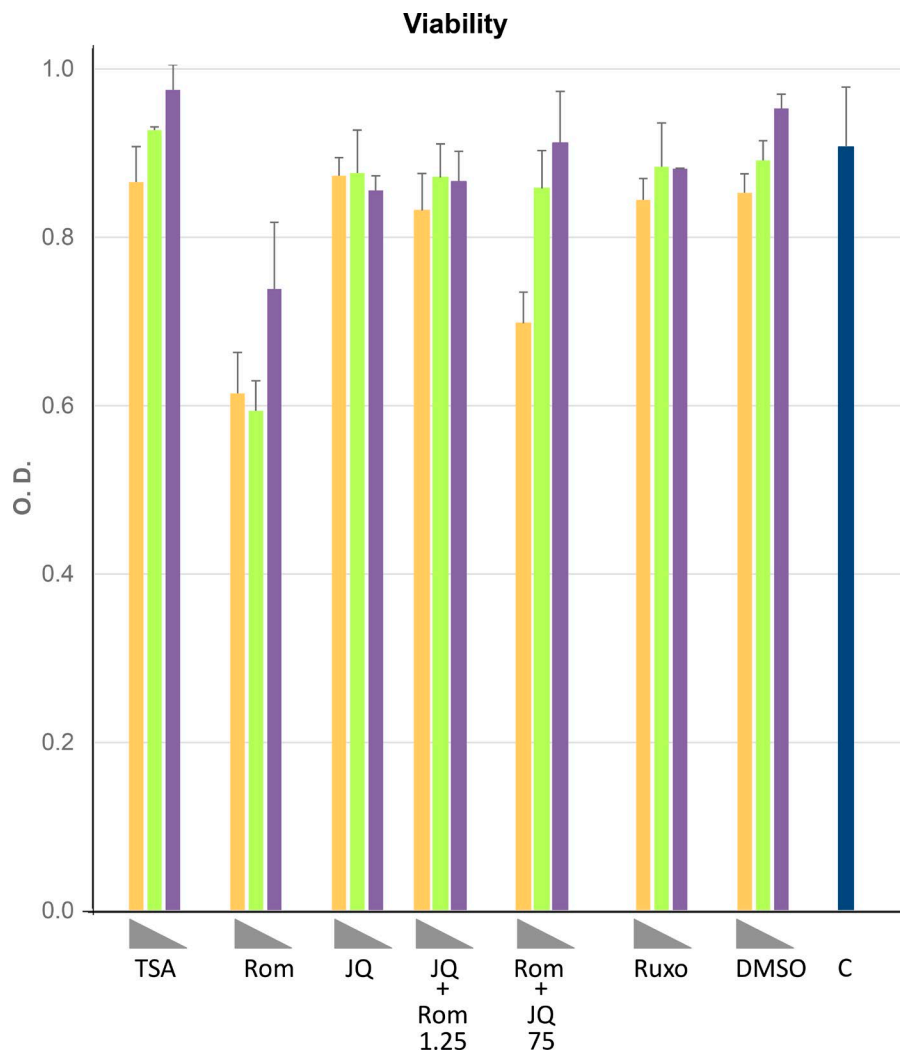

Figure S5. **HDAC and BRD4 inhibitors display minimal toxicity.** hTERT-immortalized normal human fibroblasts were treated with various concentrations of inhibitors for 2 h before measuring total cell viability. Concentrations tested were as follows: TSA, 750, 375, 187.5 nM; romidepsin, 5, 2.5, 1.25 nM; JQ-1, 300, 150, 75 nM; ruxolitinib, 250, 125, 62.5 nM; and DMSO, 5%, 2.5%, 1.25%. Cell viability of triplicate samples was measured by the absorbance at 450 nm after incubation for 1.5 h with the tetrazolium salt WST-8. Data are from a representative experiment (of two) performed in triplicate, and error bars represent +SD.

Tables S1–S4 are provided online as Excel files. Table S1 lists genes associated with IFN-induced CHIP-Seq peaks that were abrogated by HDAC inhibition. Table S2 lists genes associated with “Virus perturbations from GEO up” pathways enriched for IFN-induced CHIP-Seq peaks. Table S3 lists genes associated with “Virus perturbations from GEO down” pathways enriched for IFN-induced CHIP-Seq peaks. Table S4 lists genes regulated by IFN enriched for IFN-induced CHIP-Seq peaks.
